# Supplementary material for: TNFRSF10C methylation is a new epigenetic biomarker for colorectal cancer
Source: PeerJ. 2018 Sep 13;6:e5336. doi: 10.7717/peerj.5336 (PMC6139245; doi:10.7717/peerj.5336)
Supplement: Table S1 — LN refers to lymphatic metastasis. [file peerj-06-5336-s001.xlsx]

## Sheet: Stage one
Number	T (PMR)	N (PMR)	LN	Differentiation
1	62.01	0.152	-	High and medium
2	24.66	1.23	+	High and medium
3	0.415	3.27	+	High and medium
4	209.4	1.7	-	High and medium
5	112.9	4.74	-	High and medium
6	2.46	1.41	+	High and medium
7	11.4	0.279	+	High and medium
8	3.56	2.53	-	High and medium
9	15.42	4.84	+	High and medium
10	12.03	1.93	-	High and medium
11	1.34	1.23	+	High and medium
12	186.9	0.599	-	High and medium
13	41.65	25.42	+	High and medium
14	19.75	26.66	-	High and medium
15	6.64	6.02	-	High and medium
16	0.545	0.477	-	Low and none
17	0.267	2.5	-	High and medium
18	1.12	4.37	+	High and medium
19	40.28	2.11	-	High and medium
20	10.83	2.24	+	High and medium
21	1.16	1.88	+	Low and none
22	5.02	1.64	-	High and medium
23	0.242	2.12	-	High and medium
24	0.254	0.142	+	High and medium
25	16.48	1.56	+	High and medium
26	0.0462	1.28	+	High and medium
27	1.79	3.78	+	Low and none
28	57.18	0.359	-	Low and none
29	11.59	6.84	-	High and medium
30	5.05	1.33	+	High and medium
31	0.956	2.92	-	High and medium
32	0.151	0.655	-	High and medium
33	0.704	1.3	+	High and medium
34	22.81	2.51	-	High and medium
35	0.0967	1.46	+	High and medium
36	0.233	0.59	-	High and medium
37	0.115	1.05	-	High and medium
38	27.65	4.19	+	High and medium

## Sheet: Stage two
Number	T (PMR)	N (PMR)	Differentiation	LN	TNM stage
1	27.1	0.557	High and medium	+	Ⅲ+Ⅳ
2	131.8	1.49	High and medium	+	Ⅲ+Ⅳ
3	27.31	0.0144	High and medium	+	Ⅲ+Ⅳ
4	12.18	3.52	High and medium	-	Ⅰ+ Ⅱ
5	0.112	0.913	High and medium	+	Ⅲ+Ⅳ
6	11.05	5.37	High and medium	+	Ⅲ+Ⅳ
7	1.46	0.969	High and medium	-	Ⅰ+ Ⅱ
8	0.0706	2.67	High and medium	+	Ⅲ+Ⅳ
9	0.727	1.51	High and medium	-	Ⅰ+ Ⅱ
10	0.486	0.571	High and medium	-	Ⅰ+ Ⅱ
11	30.41	3.86	Low and none	+	Ⅲ+Ⅳ
12	62.61	0.717	Low and none	+	Ⅰ+ Ⅱ
13	5.91	0.401	High and medium	+	Ⅲ+Ⅳ
14	1.88	1.06	High and medium	+	Ⅲ+Ⅳ
15	0.751	0.306	Low and none	-	Ⅰ+ Ⅱ
16	28.21	2.48	High and medium	-	Ⅰ+ Ⅱ
17	99.72	2.89	High and medium	-	Ⅰ+ Ⅱ
18	38.37	0.435	High and medium	-	Ⅰ+ Ⅱ
19	17.37	1.17	High and medium	-	Ⅰ+ Ⅱ
20	0.72	2.61	High and medium	+	Ⅲ+Ⅳ
21	5.2	1.24	High and medium	-	Ⅰ+ Ⅱ
22	0.0014	3.34	High and medium	+	Ⅲ+Ⅳ
23	16.61	1.55	High and medium	+	Ⅲ+Ⅳ
24	1.09	0.0647	Low and none	+	Ⅲ+Ⅳ
25	680.4	53.37	High and medium	+	Ⅲ+Ⅳ
26	1.01	1.06	High and medium	-	Ⅰ+ Ⅱ
27	0.907	16.09	High and medium	+	Ⅲ+Ⅳ
28	2.47	1.08	High and medium	-	Ⅲ+Ⅳ
29	11.27	5.03	High and medium	-	Ⅰ+ Ⅱ
30	0.187	0.514	High and medium	-	Ⅰ+ Ⅱ
31	0.0617	2.92	High and medium	+	Ⅲ+Ⅳ
32	84.6	76.46	High and medium	-	Ⅰ+ Ⅱ
33	5.34	0.0735	High and medium	-	Ⅰ+ Ⅱ
34	526.2	47.66	High and medium	-	Ⅰ+ Ⅱ
35	0.0379	1.46	High and medium	-	Ⅰ+ Ⅱ
36	55.97	4.06	High and medium	-	Ⅰ+ Ⅱ
37	0.832	0.0283	High and medium	+	Ⅲ+Ⅳ
38	2.19	4.41	High and medium	+	Ⅲ+Ⅳ
39	17.13	2.89	High and medium	-	Ⅰ+ Ⅱ
40	8.31	0.607	High and medium	-	Ⅲ+Ⅳ
41	0.573	0.279	High and medium	-	Ⅲ+Ⅳ
42	0.0202	2.98	High and medium	+	Ⅲ+Ⅳ
43	0.919	2.38	High and medium	+	Ⅲ+Ⅳ
44	0.078	0.335	High and medium	-	Ⅲ+Ⅳ
45	0.243	0.425	High and medium	-	Ⅲ+Ⅳ
46	8.56	3.5	High and medium	+	Ⅲ+Ⅳ
47	0.145	2.59	High and medium	-	Ⅲ+Ⅳ
48	0.242	2.32	High and medium	+	Ⅲ+Ⅳ
49	1.32	2.27	High and medium	-	Ⅲ+Ⅳ
50	1.67	6.55	High and medium	-	Ⅰ+ Ⅱ
51	54.57	0.126	High and medium	+	Ⅰ+ Ⅱ
52	11.3	2.7	Low and none	+	Ⅰ+ Ⅱ
53	0.821	3.48	High and medium	+	Ⅰ+ Ⅱ
54	16.23	0.408	Low and none	-	Ⅲ+Ⅳ
55	9.44	2.02	Low and none	+	Ⅲ+Ⅳ
56	0.4	0.0851	Low and none	+	Ⅲ+Ⅳ
57	0.0799	3.86	Low and none	+	Ⅲ+Ⅳ
58	0.107	0.026	Low and none	+	Ⅲ+Ⅳ
59	32.61	0.352	High and medium	+	Ⅲ+Ⅳ
60	75.21	0.45	High and medium	+	Ⅰ+ Ⅱ
61	0.0337	3.31	Low and none	+	Ⅰ+ Ⅱ
62	0.275	0.103	High and medium	+	Ⅰ+ Ⅱ
63	0.352	1.79	Low and none	+	Ⅰ+ Ⅱ
64	1.78	2.36	High and medium	-	Ⅰ+ Ⅱ
65	0.0968	5.29	High and medium	+	Ⅰ+ Ⅱ
66	1.65	1.02	Low and none	+	Ⅰ+ Ⅱ
67	8.13	1.63	High and medium	+	Ⅰ+ Ⅱ
68	0.172	0.234	High and medium	+	Ⅰ+ Ⅱ
69	8.5	1.43	Low and none	-	Ⅰ+ Ⅱ
